# Supplementary material for: A Retrospective Evaluation of Risk of Peripartum Cardiac Dysfunction in Survivors of Childhood, Adolescent and Young Adult Malignancies
Source: MDPI journal article supplement (doi:10.3390/cancers11081046), 2019-07-24
Supplement: s1 [file s1]

**Table S1.** Sensitivity analysis of risk factors for pregnancy related cardiac events for all live births

| Predictor                                                                               | Median               | Number of cardiac events | Odds ratio, [95% confidence interval (CI)] | p-value |
|-----------------------------------------------------------------------------------------|----------------------|--------------------------|--------------------------------------------|---------|
| <i>Cardiac Dysfunction (N=31†)*</i>                                                     |                      |                          |                                            |         |
| Age at diagnosis of malignancy                                                          | 14 years             | 7                        | 0.902, [0.784, 1.010] **                   | 0.067   |
| Anthracycline dose (×10) (missing n=1)                                                  | 280mg/m <sup>2</sup> | 7                        | 1.070, [0.992, 1.170]                      | 0.130   |
| Maternal age at pregnancy                                                               | 31 years             | 7                        | 0.889, [0.749, 1.040] **                   | 0.130   |
| Time from cancer diagnosis to pregnancy                                                 | 11 years             | 7                        | 1.010, [0.912, 1.120] **                   | 0.620   |
| Cancer Type<br>(a) Haematological malignancy (n=18)<br>(b) Solid Tumour (n=13)          |                      | 1<br>6                   | 0.075, [0.001, 0.789]                      | 0.012   |
| Chest radiotherapy<br>(a) Chest radiotherapy (n=10)<br>(b) No chest radiotherapy (n=21) |                      | 0<br>7                   | 0.000, [0.000, 1.270]                      | 0.066   |
| <i>Symptomatic cardiac dysfunction (N=110) *</i>                                        |                      |                          |                                            |         |
| Age at diagnosis of malignancy                                                          | 21 years             | 5                        | 0.882, [0.773, 0.983] **                   | 0.017   |
| Anthracycline dose (×10) (missing n=3)                                                  | 224mg/m <sup>2</sup> | 5                        | 1.040, [0.986, 1.100]                      | 0.400   |
| Maternal age at pregnancy (missing n=5)                                                 | 31 years             | 5                        | 0.761, [0.575, 0.938] **                   | 0.006   |
| Time from cancer diagnosis to pregnancy (missing n=5)                                   | 11 years             | 5                        | 1.040, [0.905, 1.160] **                   | 0.470   |
| Cancer Type<br>(a) Haematological malignancy (n=85)<br>(b) Solid Tumour (n=25)          |                      | 0<br>5                   | 0.000, [0.000, 0.286]                      | <0.001  |
| Chest radiotherapy<br>(a) Chest radiotherapy (n=62)<br>(b) No chest radiotherapy (n=48) |                      | 0<br>5                   | 0.000, [0.000, 0.806]                      | 0.014   |

† Of 110 live births, 31 patients had peripartum TTE and were included in the analyses for cardiac dysfunction. \*Exact logistic regressions and Fisher's exact tests. \*\*Odds ratio calculated per year.
