# Supplementary material for: A Retrospective Evaluation of Risk of Peripartum Cardiac Dysfunction in Survivors of Childhood, Adolescent and Young Adult Malignancies
Source: MDPI journal article supplement (doi:10.3390/cancers11081046), 2019-07-24
Supplement: s1 [file s1]

### **Data Coding: Risk Factor Analysis**

1. Cardiac dysfunction
  - a. 1= Yes
  - b. 0= No
  - c. Blank= unknown
2. Symptomatic Heart failure
  - a. 1= Yes
  - b. 0= No
3. Cancer Type
  - a. 1= Solid malignancy
  - b. 2= Haematological malignancy
4. Chest Radiotherapy
  - a. 1= Yes
  - b. 0= No
5. Foetal death
  - a. 1= Yes
  - b. 0=No
